# Supplementary material for: Molecular characterization of the intact mouse muscle spindle using a multi-omics approach
Source: eLife. 2023 Feb 6;12:e81843. doi: 10.7554/eLife.81843 (PMC9931388; doi:10.7554/eLife.81843)
Supplement: Supplementary file 3. — Ingenuity pathway analysis revealed 325 differentially upregulated genes localized to the extracellular space. [file elife-81843-supp3.xlsx]

## Sheet: Extracellular space genes
Symbol	Entrez gene name	Location	Type(s)	Log fold change	q-value
Wnt7b	Wnt family member 7B	Extracellular Space	other	8.648	3.07e-20
Bpifb3	BPI fold containing family B member 3	Extracellular Space	other	8.351	8.99e-19
Msln	mesothelin	Extracellular Space	other	8.196	3.28e-55
Tdgf1	teratocarcinoma-derived growth factor 1	Extracellular Space	growth factor	7.893	3.9e-17
Wnt10a	Wnt family member 10A	Extracellular Space	other	7.645	4.1e-39
Vwa5b1	von Willebrand factor A domain containing 5B1	Extracellular Space	other	6.999	4.25e-09
Pnliprp1	pancreatic lipase related protein 1	Extracellular Space	enzyme	6.852	1.54e-14
Adcyap1	adenylate cyclase activating polypeptide 1	Extracellular Space	other	6.696	5e-10
Spag11b	sperm associated antigen 11B	Extracellular Space	other	6.634	3.72e-10
Cfap57	cilia and flagella associated protein 57	Extracellular Space	other	6.558	1.84e-08
Bmp15	bone morphogenetic protein 15	Extracellular Space	growth factor	6.429	3.92e-07
Wnt1	Wnt family member 1	Extracellular Space	cytokine	6.374	3.27e-09
Olfm4	olfactomedin 4	Extracellular Space	other	6.364	3.77e-08
Myh15	myosin heavy chain 15	Extracellular Space	other	6.356	4.65e-24
Lgals7	galectin 7	Extracellular Space	other	6.015	3.55e-11
Ndp	NDP, norrin cystine knot growth factor	Extracellular Space	growth factor	6.012	8.8e-09
Bpifa2	BPI fold containing family A member 2	Extracellular Space	other	6.008	9.95e-40
Coch	cochlin	Extracellular Space	other	5.971	7.43e-16
Notum	notum, palmitoleoyl-protein carboxylesterase	Extracellular Space	enzyme	5.866	2.05e-25
Adamts19	ADAM metallopeptidase with thrombospondin type 1 motif 19	Extracellular Space	peptidase	5.377	1.49e-08
Fgfbp1	fibroblast growth factor binding protein 1	Extracellular Space	other	5.347	1.25e-05
Sostdc1	sclerostin domain containing 1	Extracellular Space	growth factor	5.288	7.43e-62
Wnt3	Wnt family member 3	Extracellular Space	other	5.262	2.85e-11
Jakmip2	janus kinase and microtubule interacting protein 2	Extracellular Space	other	5.192	1.88e-05
Hapln1	hyaluronan and proteoglycan link protein 1	Extracellular Space	other	5.041	7.62e-12
Areg	amphiregulin	Extracellular Space	growth factor	5.013	0.000115
Rspo3	R-spondin 3	Extracellular Space	kinase	4.994	4.47e-52
Bpifb2	BPI fold containing family B member 2	Extracellular Space	other	4.912	4.56e-07
Sbspon	somatomedin B and thrombospondin type 1 domain containing	Extracellular Space	other	4.893	2.34e-20
Esm1	endothelial cell specific molecule 1	Extracellular Space	growth factor	4.613	2.32e-33
Wnt16	Wnt family member 16	Extracellular Space	other	4.562	7.01e-13
Fgf4	fibroblast growth factor 4	Extracellular Space	growth factor	4.496	1.02e-05
A2ml1	alpha-2-macroglobulin like 1 pseudogene	Extracellular Space	other	4.477	0.000485
Lad1	ladinin 1	Extracellular Space	other	4.472	8.03e-07
Tff2	trefoil factor 2	Extracellular Space	other	4.387	0.000128
Wnt6	Wnt family member 6	Extracellular Space	other	4.3	7.16e-41
Bmp7	bone morphogenetic protein 7	Extracellular Space	growth factor	4.121	1.89e-47
Col9a2	collagen type IX alpha 2 chain	Extracellular Space	other	4.112	1.74e-15
Dkk2	dickkopf WNT signaling pathway inhibitor 2	Extracellular Space	other	4.086	2.39e-36
Tmprss11e	transmembrane serine protease 11E	Extracellular Space	peptidase	4.078	0.00457
Spp1	secreted phosphoprotein 1	Extracellular Space	cytokine	4.006	2.83e-17
Cfh	complement factor H	Extracellular Space	other	3.973	1.36e-39
Csn3	casein kappa	Extracellular Space	other	3.95	0.0077
Klkb1	kallikrein B1	Extracellular Space	peptidase	3.94	0.0136
Chil1	chitinase 3 like 1	Extracellular Space	enzyme	3.925	1.62e-05
Eln	elastin	Extracellular Space	other	3.87	2.7e-69
Dkk3	dickkopf WNT signaling pathway inhibitor 3	Extracellular Space	cytokine	3.855	1.38e-36
Ltbp2	latent transforming growth factor beta binding protein 2	Extracellular Space	other	3.81	6.95e-08
Col9a1	collagen type IX alpha 1 chain	Extracellular Space	other	3.792	1.53e-05
Tac1	tachykinin precursor 1	Extracellular Space	other	3.772	0.0001
Fstl5	follistatin like 5	Extracellular Space	other	3.753	0.00429
Muc5b	mucin 5B, oligomeric mucus/gel-forming	Extracellular Space	peptidase	3.744	0.000784
Aoah	acyloxyacyl hydrolase	Extracellular Space	enzyme	3.734	5.43e-05
C2	complement C2	Extracellular Space	peptidase	3.725	1.56e-22
Inhbb	inhibin subunit beta B	Extracellular Space	growth factor	3.724	2.24e-17
Wif1	WNT inhibitory factor 1	Extracellular Space	other	3.7	1.42e-10
Pthlh	parathyroid hormone like hormone	Extracellular Space	other	3.629	1.25e-27
Nrg2	neuregulin 2	Extracellular Space	growth factor	3.614	3.62e-11
Apod	apolipoprotein D	Extracellular Space	transporter	3.536	2.08e-27
Klk9	kallikrein related peptidase 9	Extracellular Space	peptidase	3.503	0.000796
Klk1b26	kallikrein related peptidase 3	Extracellular Space	peptidase	3.456	1.7e-10
Fgf23	fibroblast growth factor 23	Extracellular Space	growth factor	3.428	0.00327
Pcdhb6	protocadherin beta 6	Extracellular Space	other	3.415	0.00128
Emilin3	elastin microfibril interfacer 3	Extracellular Space	other	3.396	7.18e-17
Cpne9	copine family member 9	Extracellular Space	other	3.366	0.00567
Ntng1	netrin G1	Extracellular Space	other	3.334	1.43e-20
Itih2	inter-alpha-trypsin inhibitor heavy chain 2	Extracellular Space	other	3.304	1.28e-07
Inhba	inhibin subunit beta A	Extracellular Space	growth factor	3.301	3.82e-19
F5	coagulation factor V	Extracellular Space	other	3.297	0.00666
Abca13	ATP binding cassette subfamily A member 13	Extracellular Space	transporter	3.292	0.0169
Pappa2	pappalysin 2	Extracellular Space	peptidase	3.239	0.00376
Ndnf	neuron derived neurotrophic factor	Extracellular Space	other	3.217	2.93e-10
Sema3d	semaphorin 3D	Extracellular Space	other	3.092	1.61e-12
Lrrtm4	leucine rich repeat transmembrane neuronal 4	Extracellular Space	other	3.09	0.0375
Ebi3	Epstein-Barr virus induced 3	Extracellular Space	cytokine	3.088	0.00188
Igfbp6	insulin like growth factor binding protein 6	Extracellular Space	other	3.067	9.8e-37
Mamdc2	MAM domain containing 2	Extracellular Space	other	3.06	9.55e-19
Dhh	desert hedgehog	Extracellular Space	peptidase	3.051	1.49e-19
Acpp	acid phosphatase, prostate	Extracellular Space	phosphatase	3.044	0.000813
Fbln1	fibulin 1	Extracellular Space	other	3.004	1.33e-29
Slamf9	SLAM family member 9	Extracellular Space	other	2.992	4.53e-06
Klk10	kallikrein related peptidase 10	Extracellular Space	peptidase	2.92	5.72e-06
Pcsk2	proprotein convertase subtilisin/kexin type 2	Extracellular Space	peptidase	2.912	4.09e-09
Egfl6	EGF like domain multiple 6	Extracellular Space	other	2.903	7.63e-07
Col6a5	collagen type VI alpha 5 chain	Extracellular Space	other	2.897	0.00032
Serpinc1	serpin family C member 1	Extracellular Space	enzyme	2.878	0.00233
Fstl3	follistatin like 3	Extracellular Space	other	2.827	5.67e-06
Nell2	neural EGFL like 2	Extracellular Space	other	2.823	0.00646
Chrdl1	chordin like 1	Extracellular Space	other	2.796	1.89e-16
Itgbl1	integrin subunit beta like 1	Extracellular Space	other	2.783	3.29e-06
Kl	klotho	Extracellular Space	enzyme	2.728	0.0149
Morn4	MORN repeat containing 4	Extracellular Space	other	2.689	0.00178
Vcan	versican	Extracellular Space	other	2.68	1.37e-16
Axdnd1	axonemal dynein light chain domain containing 1	Extracellular Space	other	2.675	0.036
Omd	osteomodulin	Extracellular Space	other	2.665	1.51e-08
Ccdc114	coiled-coil domain containing 114	Extracellular Space	other	2.64	5.94e-10
Pla2g2d	phospholipase A2 group IID	Extracellular Space	enzyme	2.603	5.29e-05
Igf1	insulin like growth factor 1	Extracellular Space	growth factor	2.561	8.94e-15
Ptn	pleiotrophin	Extracellular Space	growth factor	2.555	1.15e-07
Fgf14	fibroblast growth factor 14	Extracellular Space	growth factor	2.536	0.00017
Il1rn	interleukin 1 receptor antagonist	Extracellular Space	cytokine	2.519	0.0331
Tgfa	transforming growth factor alpha	Extracellular Space	growth factor	2.519	6.23e-08
Lamb3	laminin subunit beta 3	Extracellular Space	transporter	2.513	5.26e-15
Ntn1	netrin 1	Extracellular Space	other	2.485	7.73e-26
Serpina3n	serpin family A member 3	Extracellular Space	other	2.481	8.48e-06
Mbp	myelin basic protein	Extracellular Space	other	2.469	1.46e-07
Cspg5	chondroitin sulfate proteoglycan 5	Extracellular Space	growth factor	2.463	0.000848
Slitrk4	SLIT and NTRK like family member 4	Extracellular Space	other	2.438	0.000781
Tsku	tsukushi, small leucine rich proteoglycan	Extracellular Space	other	2.408	2.25e-25
Gdnf	glial cell derived neurotrophic factor	Extracellular Space	growth factor	2.391	2.98e-06
Fbn2	fibrillin 2	Extracellular Space	other	2.371	8.45e-05
Matn2	matrilin 2	Extracellular Space	other	2.36	6.27e-20
Cpxm2	carboxypeptidase X, M14 family member 2	Extracellular Space	peptidase	2.356	0.00125
Islr	immunoglobulin superfamily containing leucine rich repeat	Extracellular Space	other	2.348	2.49e-38
Olfml1	olfactomedin like 1	Extracellular Space	other	2.324	8.33e-19
Rbp1	retinol binding protein 1	Extracellular Space	transporter	2.315	6.6e-16
Cthrc1	collagen triple helix repeat containing 1	Extracellular Space	other	2.305	0.00165
Fam184a	family with sequence similarity 184 member A	Extracellular Space	other	2.303	5.53e-05
Fgf18	fibroblast growth factor 18	Extracellular Space	growth factor	2.28	1.2e-10
Dnah6	dynein axonemal heavy chain 6	Extracellular Space	other	2.273	0.0435
Gkn3	gastrokine 3	Extracellular Space	other	2.266	0.000882
Fgl2	fibrinogen like 2	Extracellular Space	peptidase	2.263	2.56e-11
C4b	complement C4B (Chido blood group)	Extracellular Space	peptidase	2.244	1.24e-09
Col8a2	collagen type VIII alpha 2 chain	Extracellular Space	other	2.24	0.0046
Kif19a	kinesin family member 19	Extracellular Space	enzyme	2.219	4.47e-08
Fgf16	fibroblast growth factor 16	Extracellular Space	growth factor	2.215	0.00248
Prss12	serine protease 12	Extracellular Space	peptidase	2.213	7.74e-17
C1rl	complement C1r subcomponent like	Extracellular Space	peptidase	2.209	0.00123
Lrrn3	leucine rich repeat neuronal 3	Extracellular Space	other	2.191	0.00114
Ccdc116	coiled-coil domain containing 116	Extracellular Space	other	2.167	0.0201
Adamts15	ADAM metallopeptidase with thrombospondin type 1 motif 15	Extracellular Space	peptidase	2.158	1.25e-08
C1qtnf7	C1q and TNF related 7	Extracellular Space	other	2.139	3.11e-11
Cilp	cartilage intermediate layer protein	Extracellular Space	phosphatase	2.123	0.000331
Nradd	neurotrophin receptor associated death domain	Extracellular Space	cytokine	2.115	4.53e-07
Rbp4	retinol binding protein 4	Extracellular Space	other	2.109	3.67e-05
Thbs2	thrombospondin 2	Extracellular Space	other	2.103	7.4e-05
Egfl8	EGF like domain multiple 8	Extracellular Space	other	2.097	1.94e-08
Loxl4	lysyl oxidase like 4	Extracellular Space	enzyme	2.094	6.03e-05
Rpgrip1	RPGR interacting protein 1	Extracellular Space	other	2.094	0.0149
Cxcl14	C-X-C motif chemokine ligand 14	Extracellular Space	cytokine	2.09	2.9e-13
Reln	reelin	Extracellular Space	peptidase	2.081	2.08e-13
Penk	proenkephalin	Extracellular Space	other	2.08	6.08e-12
Ctrl	chymotrypsin like	Extracellular Space	peptidase	2.062	0.0214
Masp1	mannan-binding lectin serine peptidase 1	Extracellular Space	peptidase	2.062	3.77e-08
Clcf1	cardiotrophin like cytokine factor 1	Extracellular Space	cytokine	2.061	2.62e-08
Htra1	HtrA serine peptidase 1	Extracellular Space	peptidase	2.055	6.78e-26
Fndc4	fibronectin type III domain containing 4	Extracellular Space	other	2.051	7.44e-12
Ogn	osteoglycin	Extracellular Space	growth factor	2.047	3.48e-05
Col12a1	collagen type XII alpha 1 chain	Extracellular Space	other	2.042	0.0022
C1qa	complement C1q A chain	Extracellular Space	peptidase	2.032	1.75e-12
Pgf	placental growth factor	Extracellular Space	growth factor	2.032	1.2e-10
Lgals3	galectin 3	Extracellular Space	other	2.031	6.04e-08
Parm1	prostate androgen-regulated mucin-like protein 1	Extracellular Space	other	2.03	2.52e-12
Wnt2b	Wnt family member 2B	Extracellular Space	other	2.02	6.12e-09
Tex15	testis expressed 15, meiosis and synapsis associated	Extracellular Space	other	1.996	0.0403
C1qb	complement C1q B chain	Extracellular Space	peptidase	1.987	6.39e-10
Lamc2	laminin subunit gamma 2	Extracellular Space	other	1.979	5.16e-11
Ccl21a	C-C motif chemokine ligand 21	Extracellular Space	cytokine	1.975	0.00626
Fcna	ficolin A	Extracellular Space	other	1.974	1.07e-05
Qrfp	pyroglutamylated RFamide peptide	Extracellular Space	other	1.974	0.00165
C1qc	complement C1q C chain	Extracellular Space	peptidase	1.973	3.46e-14
Vit	vitrin	Extracellular Space	other	1.969	4.39e-05
Adamts6	ADAM metallopeptidase with thrombospondin type 1 motif 6	Extracellular Space	peptidase	1.966	1.02e-07
Bmp3	bone morphogenetic protein 3	Extracellular Space	growth factor	1.964	2.59e-07
Mdk	midkine	Extracellular Space	growth factor	1.951	2.76e-07
Serping1	serpin family G member 1	Extracellular Space	other	1.949	2.35e-16
Nxph3	neurexophilin 3	Extracellular Space	other	1.947	0.00406
Trf	transferrin	Extracellular Space	transporter	1.934	0.0176
Mfap5	microfibril associated protein 5	Extracellular Space	other	1.932	3.78e-12
Col9a3	collagen type IX alpha 3 chain	Extracellular Space	other	1.928	0.0206
Edn3	endothelin 3	Extracellular Space	other	1.908	6.79e-06
Gjc3	gap junction protein gamma 3	Extracellular Space	transporter	1.907	6.74e-13
Med12l	mediator complex subunit 12 like	Extracellular Space	other	1.905	0.00184
Nptx1	neuronal pentraxin 1	Extracellular Space	other	1.904	0.0203
Col8a1	collagen type VIII alpha 1 chain	Extracellular Space	other	1.903	3.4e-19
Bgn	biglycan	Extracellular Space	other	1.901	3.08e-09
Fgf9	fibroblast growth factor 9	Extracellular Space	growth factor	1.897	5.56e-06
Wnt10b	Wnt family member 10B	Extracellular Space	other	1.894	0.00401
Nog	noggin	Extracellular Space	growth factor	1.886	1.94e-12
Spock3	SPARC (osteonectin), cwcv and kazal like domains proteoglycan 3	Extracellular Space	other	1.883	0.0167
Tctn2	tectonic family member 2	Extracellular Space	other	1.881	7e-08
Tgfbi	transforming growth factor beta induced	Extracellular Space	other	1.871	1.75e-13
Hmcn1	hemicentin 1	Extracellular Space	other	1.864	8.84e-10
Igfbp4	insulin like growth factor binding protein 4	Extracellular Space	other	1.842	1.17e-19
Col4a5	collagen type IV alpha 5 chain	Extracellular Space	other	1.832	9.4e-10
Col28a1	collagen type XXVIII alpha 1 chain	Extracellular Space	other	1.828	7.79e-07
Hmcn2	hemicentin 2	Extracellular Space	other	1.815	2.92e-14
Mmp3	matrix metallopeptidase 3	Extracellular Space	peptidase	1.814	0.0257
Prtg	protogenin	Extracellular Space	other	1.81	0.000603
Dnah1	dynein axonemal heavy chain 1	Extracellular Space	other	1.802	0.0163
Cytl1	cytokine like 1	Extracellular Space	cytokine	1.794	0.000797
Tll1	tolloid like 1	Extracellular Space	peptidase	1.781	7.7e-07
Endod1	endonuclease domain containing 1	Extracellular Space	enzyme	1.772	2.21e-15
Lrp4	LDL receptor related protein 4	Extracellular Space	other	1.771	7.67e-21
Olfml3	olfactomedin like 3	Extracellular Space	other	1.77	1.54e-05
Ntn4	netrin 4	Extracellular Space	other	1.722	2.49e-29
Kif7	kinesin family member 7	Extracellular Space	other	1.716	0.011
Armc2	armadillo repeat containing 2	Extracellular Space	other	1.705	0.00563
Cp	ceruloplasmin	Extracellular Space	enzyme	1.705	1.9e-09
C1ql3	complement C1q like 3	Extracellular Space	other	1.704	0.0115
Nov	nephroblastoma overexpressed	Extracellular Space	growth factor	1.697	4.59e-07
Dcn	decorin	Extracellular Space	other	1.696	1.38e-08
Cx3cl1	C-X3-C motif chemokine ligand 1	Extracellular Space	cytokine	1.693	1.66e-05
Ntf3	neurotrophin 3	Extracellular Space	growth factor	1.691	1.13e-05
Rnase4	ribonuclease A family member 4	Extracellular Space	enzyme	1.69	5.95e-11
Sema3b	semaphorin 3B	Extracellular Space	other	1.686	7.64e-10
Lyz2	lysozyme	Extracellular Space	enzyme	1.685	1.07e-08
Edil3	EGF like repeats and discoidin domains 3	Extracellular Space	other	1.682	0.000111
Col19a1	collagen type XIX alpha 1 chain	Extracellular Space	other	1.681	0.0296
Frzb	frizzled related protein	Extracellular Space	other	1.677	2.26e-22
Pamr1	peptidase domain containing associated with muscle regeneration 1	Extracellular Space	peptidase	1.676	0.000606
Lgi4	leucine rich repeat LGI family member 4	Extracellular Space	other	1.673	8.08e-08
Col18a1	collagen type XVIII alpha 1 chain	Extracellular Space	other	1.671	3.95e-10
Mgp	matrix Gla protein	Extracellular Space	other	1.664	0.00219
Col27a1	collagen type XXVII alpha 1 chain	Extracellular Space	other	1.657	6.86e-09
Susd2	sushi domain containing 2	Extracellular Space	other	1.651	2.55e-06
Prelp	proline and arginine rich end leucine rich repeat protein	Extracellular Space	other	1.647	2.36e-05
Tfpi2	tissue factor pathway inhibitor 2	Extracellular Space	other	1.646	0.0369
Lama3	laminin subunit alpha 3	Extracellular Space	other	1.63	3.29e-05
Spon2	spondin 2	Extracellular Space	other	1.627	0.0232
Lum	lumican	Extracellular Space	other	1.611	4.72e-10
Ang	angiogenin	Extracellular Space	enzyme	1.606	0.0018
Car11	carbonic anhydrase 11	Extracellular Space	enzyme	1.592	6.01e-07
Mmrn1	multimerin 1	Extracellular Space	other	1.592	0.0163
Thbs1	thrombospondin 1	Extracellular Space	other	1.588	0.000536
Catsperg1	cation channel sperm associated auxiliary subunit gamma	Extracellular Space	other	1.574	0.0123
Postn	periostin	Extracellular Space	other	1.571	0.0092
Bank1	B cell scaffold protein with ankyrin repeats 1	Extracellular Space	other	1.566	0.0309
Fndc5	fibronectin type III domain containing 5	Extracellular Space	other	1.564	1.56e-10
Wdr19	WD repeat domain 19	Extracellular Space	other	1.553	1.36e-06
AI467606	chromosome 16 open reading frame 54	Extracellular Space	other	1.55	0.000592
Lrrc17	leucine rich repeat containing 17	Extracellular Space	other	1.55	5.9e-08
Il16	interleukin 16	Extracellular Space	cytokine	1.539	4.05e-10
Slit2	slit guidance ligand 2	Extracellular Space	other	1.534	5.38e-06
Apoe	apolipoprotein E	Extracellular Space	transporter	1.533	5.64e-15
Col4a6	collagen type IV alpha 6 chain	Extracellular Space	other	1.53	0.036
Pld4	phospholipase D family member 4	Extracellular Space	enzyme	1.529	3.96e-08
Sema3a	semaphorin 3A	Extracellular Space	other	1.527	0.0292
Ltbp1	latent transforming growth factor beta binding protein 1	Extracellular Space	other	1.515	2.31e-14
Thbs3	thrombospondin 3	Extracellular Space	other	1.515	1.42e-10
Spock2	SPARC (osteonectin), cwcv and kazal like domains proteoglycan 2	Extracellular Space	other	1.514	7.21e-06
Cklf	chemokine like factor	Extracellular Space	cytokine	1.509	0.000342
Efemp1	EGF containing fibulin extracellular matrix protein 1	Extracellular Space	enzyme	1.487	1.14e-07
Ccl9	chemokine (C-C motif) ligand 9	Extracellular Space	cytokine	1.464	0.000121
Olfml2a	olfactomedin like 2A	Extracellular Space	other	1.463	7.75e-10
Ctgf	connective tissue growth factor	Extracellular Space	growth factor	1.46	0.0444
Mmp19	matrix metallopeptidase 19	Extracellular Space	peptidase	1.437	0.000316
Col14a1	collagen type XIV alpha 1 chain	Extracellular Space	other	1.428	2e-07
Igfbp3	insulin like growth factor binding protein 3	Extracellular Space	other	1.424	2.62e-09
Pf4	platelet factor 4	Extracellular Space	cytokine	1.423	2.55e-05
Tnxb	tenascin XB	Extracellular Space	other	1.423	2.85e-10
Ift81	intraflagellar transport 81	Extracellular Space	other	1.408	4.22e-06
Mmp16	matrix metallopeptidase 16	Extracellular Space	peptidase	1.399	0.00159
Colq	collagen like tail subunit of asymmetric acetylcholinesterase	Extracellular Space	other	1.387	7.94e-17
Apol6	apolipoprotein L6	Extracellular Space	transporter	1.38	5.45e-08
Sod3	superoxide dismutase 3	Extracellular Space	enzyme	1.37	1.02e-05
Fjx1	four jointed box 1	Extracellular Space	other	1.369	0.000608
Scgb3a1	secretoglobin family 3A member 1	Extracellular Space	cytokine	1.369	0.0429
Dzip1l	DAZ interacting zinc finger protein 1 like	Extracellular Space	other	1.36	8.22e-07
Il33	interleukin 33	Extracellular Space	cytokine	1.351	8.09e-06
F13a1	coagulation factor XIII A chain	Extracellular Space	enzyme	1.346	3.48e-11
Ecm1	extracellular matrix protein 1	Extracellular Space	transporter	1.345	3.64e-10
Megf9	multiple EGF like domains 9	Extracellular Space	other	1.321	5.9e-09
Chrd	chordin	Extracellular Space	other	1.304	2.3e-12
Ccl24	C-C motif chemokine ligand 24	Extracellular Space	cytokine	1.302	0.00799
Tmem107	transmembrane protein 107	Extracellular Space	other	1.301	0.00184
Adamtsl1	ADAMTS like 1	Extracellular Space	other	1.276	4.88e-17
Pkhd1l1	PKHD1 like 1	Extracellular Space	other	1.267	0.0164
Mmp2	matrix metallopeptidase 2	Extracellular Space	peptidase	1.263	2.09e-08
Pcolce	procollagen C-endopeptidase enhancer	Extracellular Space	other	1.263	1.27e-07
Agrp	agouti related neuropeptide	Extracellular Space	other	1.262	0.00837
Pi15	peptidase inhibitor 15	Extracellular Space	other	1.258	0.0166
Lyz1	lysozyme	Extracellular Space	enzyme	1.253	0.017
C1qtnf2	C1q and TNF related 2	Extracellular Space	other	1.247	8.88e-05
Inha	inhibin subunit alpha	Extracellular Space	growth factor	1.235	0.000132
Plat	plasminogen activator, tissue type	Extracellular Space	peptidase	1.233	4.29e-09
Cxcl11	chemokine (C-X-C motif) ligand 11	Extracellular Space	cytokine	1.225	0.00452
Retnla	resistin like alpha	Extracellular Space	other	1.221	0.0114
Fstl1	follistatin like 1	Extracellular Space	other	1.22	1.92e-09
Tslp	thymic stromal lymphopoietin	Extracellular Space	cytokine	1.22	0.0369
Edn1	endothelin 1	Extracellular Space	cytokine	1.217	5.99e-06
C1s1	complement C1s	Extracellular Space	peptidase	1.211	3.36e-07
Isg15	ISG15 ubiquitin-like modifier	Extracellular Space	other	1.211	0.000327
Spred3	sprouty related EVH1 domain containing 3	Extracellular Space	cytokine	1.21	0.00066
Adamts10	ADAM metallopeptidase with thrombospondin type 1 motif 10	Extracellular Space	peptidase	1.196	1.48e-13
Ccl6	chemokine (C-C motif) ligand 6	Extracellular Space	cytokine	1.196	0.0129
Adamtsl2	ADAMTS like 2	Extracellular Space	other	1.191	0.0101
Timp2	TIMP metallopeptidase inhibitor 2	Extracellular Space	other	1.189	2.78e-08
Fst	follistatin	Extracellular Space	other	1.181	0.000136
Cmtm3	CKLF like MARVEL transmembrane domain containing 3	Extracellular Space	cytokine	1.179	1.46e-09
Mmp14	matrix metallopeptidase 14	Extracellular Space	peptidase	1.178	6.37e-08
Ttc26	tetratricopeptide repeat domain 26	Extracellular Space	other	1.174	0.00533
Trip6	thyroid hormone receptor interactor 6	Extracellular Space	cytokine	1.168	8.98e-09
Fam114a1	family with sequence similarity 114 member A1	Extracellular Space	other	1.164	2.09e-08
Prg4	proteoglycan 4 (megakaryocyte stimulating factor, articular superficial zone protein)	Extracellular Space	other	1.162	0.0109
Fbln5	fibulin 5	Extracellular Space	other	1.161	5.21e-06
Cnrip1	cannabinoid receptor interacting protein 1	Extracellular Space	other	1.147	0.00174
Wisp2	WNT1 inducible signaling pathway protein 2	Extracellular Space	growth factor	1.145	0.0344
Npdc1	neural proliferation, differentiation and control 1	Extracellular Space	other	1.133	1.54e-10
Smoc2	SPARC related modular calcium binding 2	Extracellular Space	other	1.125	1.7e-08
Col16a1	collagen type XVI alpha 1 chain	Extracellular Space	other	1.121	0.00756
Col20a1	collagen type XX alpha 1 chain	Extracellular Space	other	1.121	1.45e-05
Lgals1	galectin 1	Extracellular Space	other	1.111	1.51e-05
Tprn	taperin	Extracellular Space	other	1.106	0.00026
Col5a2	collagen type V alpha 2 chain	Extracellular Space	other	1.097	8.66e-09
Clec3b	C-type lectin domain family 3 member B	Extracellular Space	other	1.096	3.93e-07
Bmp4	bone morphogenetic protein 4	Extracellular Space	growth factor	1.086	4.72e-07
Mmp17	matrix metallopeptidase 17	Extracellular Space	peptidase	1.081	0.0136
Lefty1	left-right determination factor 1	Extracellular Space	growth factor	1.074	0.0399
Tfpi	tissue factor pathway inhibitor	Extracellular Space	other	1.07	8.76e-06
Col3a1	collagen type III alpha 1 chain	Extracellular Space	other	1.059	1.25e-09
Slit3	slit guidance ligand 3	Extracellular Space	other	1.051	0.000415
Ecm2	extracellular matrix protein 2	Extracellular Space	other	1.048	2.79e-06
Adamts7	ADAM metallopeptidase with thrombospondin type 1 motif 7	Extracellular Space	peptidase	1.044	0.000252
Lca5	LCA5, lebercilin	Extracellular Space	other	1.042	0.0127
Glb1l	galactosidase beta 1 like	Extracellular Space	other	1.041	0.00482
Sema3f	semaphorin 3F	Extracellular Space	other	1.04	1.18e-08
Dsel	dermatan sulfate epimerase like	Extracellular Space	enzyme	1.039	1.58e-05
Mxra7	matrix-remodelling associated 7	Extracellular Space	other	1.029	1.18e-08
Mmp28	matrix metallopeptidase 28	Extracellular Space	peptidase	1.027	0.00689
Bmp2	bone morphogenetic protein 2	Extracellular Space	growth factor	1.026	0.000182
Pdgfa	platelet derived growth factor subunit A	Extracellular Space	growth factor	1.025	5.29e-08
Bmp1	bone morphogenetic protein 1	Extracellular Space	peptidase	1.024	1.86e-11
Loxl3	lysyl oxidase like 3	Extracellular Space	enzyme	1.022	0.00374
Nid2	nidogen 2	Extracellular Space	other	1.017	1.93e-06
